# Supplementary material for: Dioxin-like Activity in Pregnant Women and Indices of Fetal Growth: The ACCEPT Birth Cohort
Source: MDPI journal article supplement (doi:10.3390/toxics10010026), 2022-01-08
Supplement: s1 [file s1]

# Supplementary Materials: Dioxin-like Activity in Pregnant Women and Indices of Fetal Growth: The ACCEPT Birth Cohort

Manhai Long, Maria Wielsøe and Eva Cecilie Bonefeld-Jørgensen

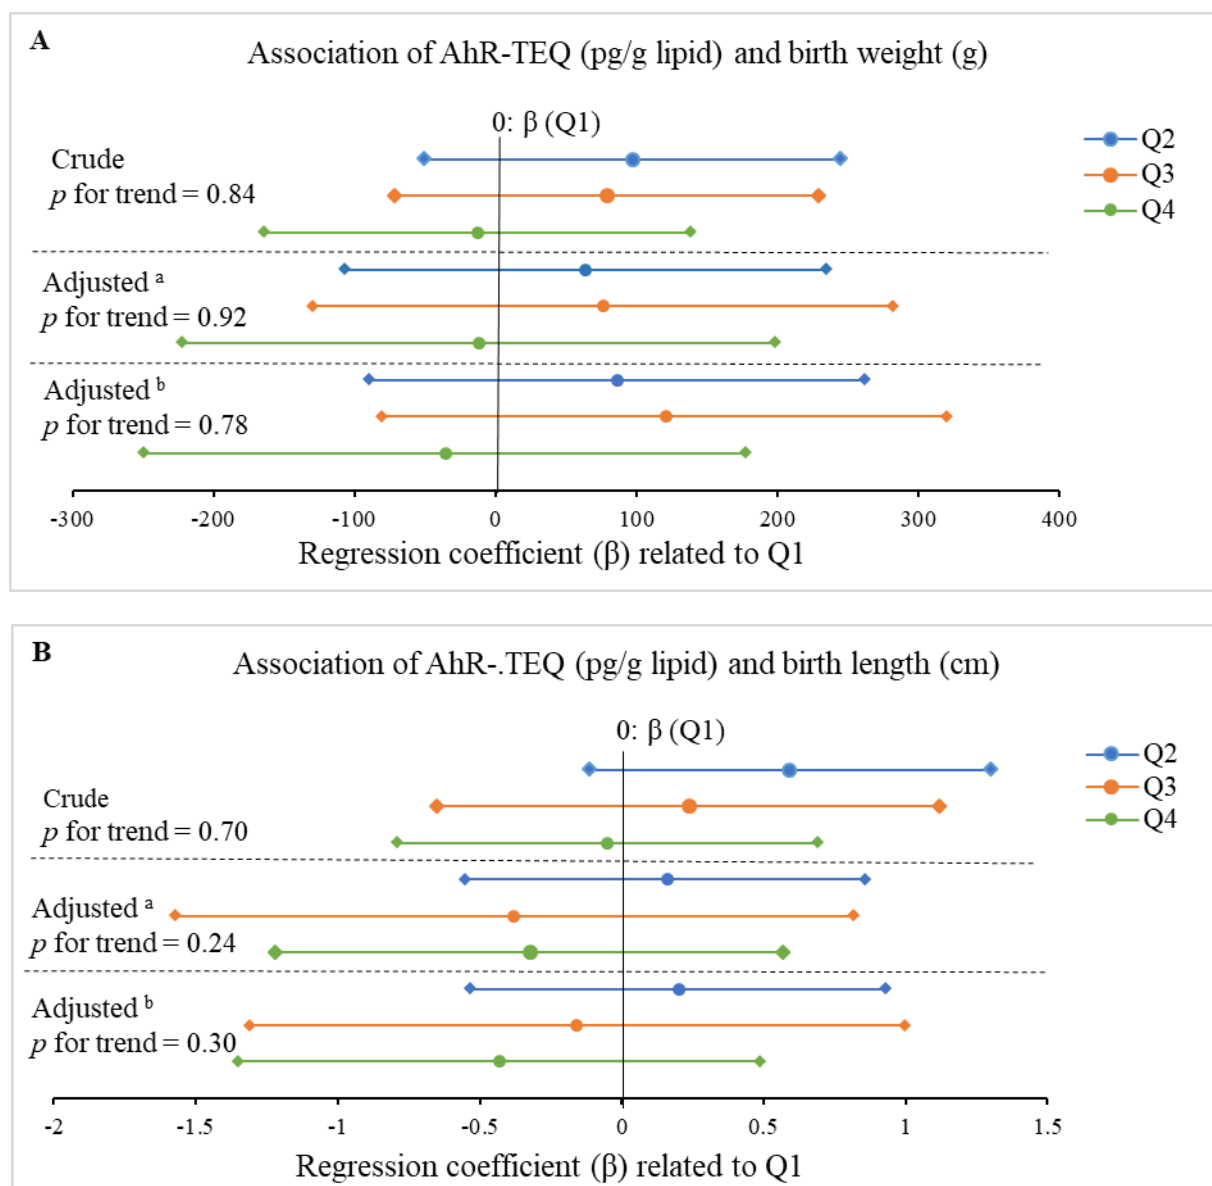

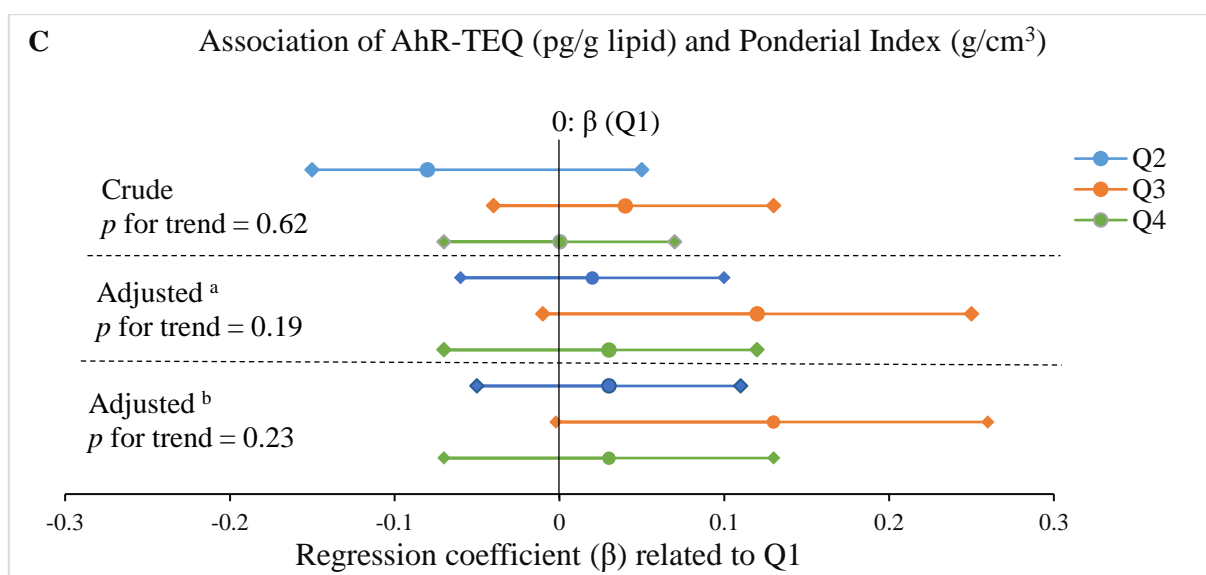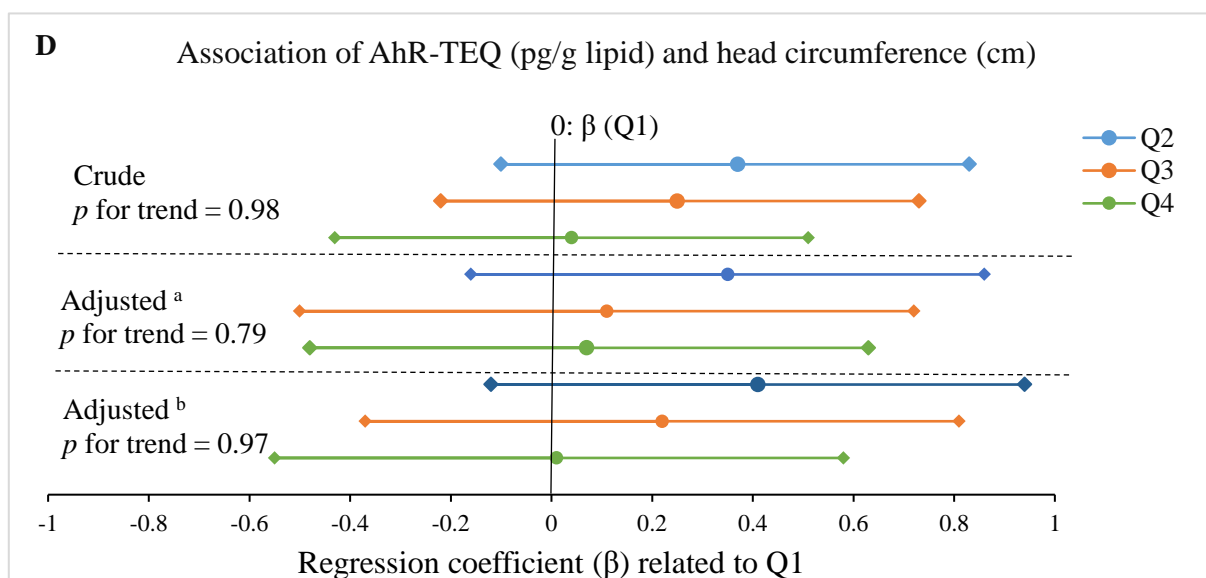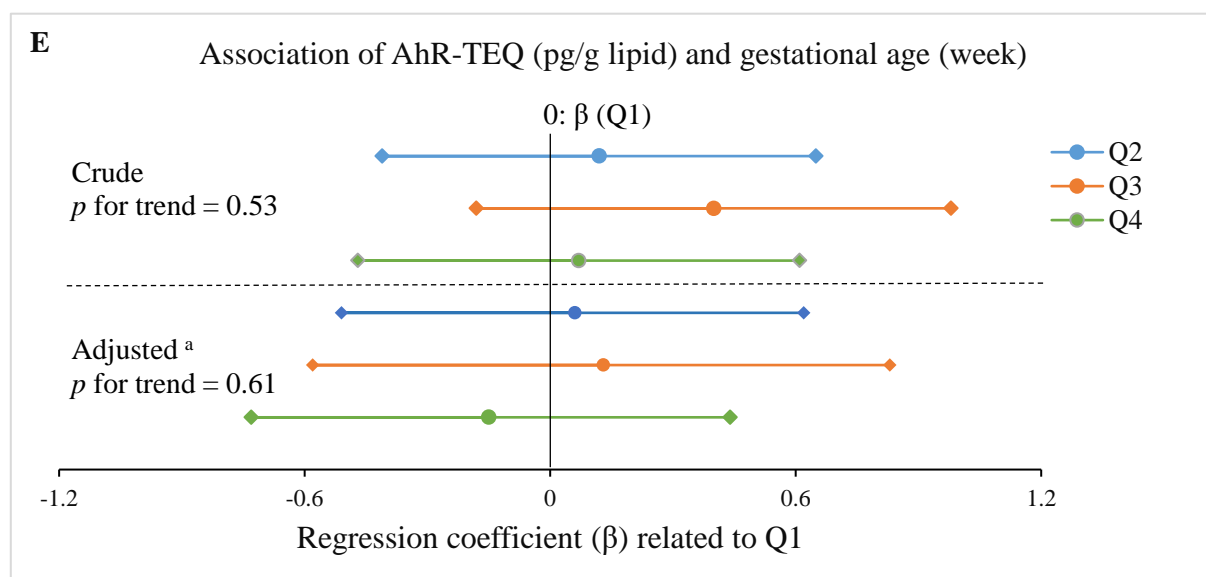

**Figure S1.** The association of quartiles of AhR-TEQ (pg/g) and foetal growth indices. **A)** Association of AhR-TEQ (pg/g lipid) and birth weight (g); **B)** Association of AhR-TEQ and birth length (cm); **C)** Association of AhR-TEQ (pg/g lipid) and Ponderal Index (g/cm<sup>3</sup>); **D)** Association of AhR-TEQ (pg/g lipid) and head circumference (cm); **E)** Association of AhR-TEQ (pg/g lipid) and gestational age (week). Adjusted <sup>a</sup>: adjusted for maternal age, pre-pregnancy BMI, alcohol consumption during pregnancy and parity. Adjusted <sup>b</sup>: adjusted for maternal age, pre-pregnancy BMI, alcohol consumption during pregnancy, parity and gestational age. Round circle: estimate ( $\beta$ ). Diamond circle: end of 95% CI.

**Table S1.** Levels of lipophilic POPs and dioxin like activity in maternal serum and fetal growth indices stratified by infant gender<sup>a,c</sup>.

|                                 |                  | Male             | Female           | <i>p</i>          | All              |
|---------------------------------|------------------|------------------|------------------|-------------------|------------------|
| <b>POPs (µg/kg serum lipid)</b> | <b>n</b>         | 237              | 211              |                   | 449              |
|                                 | Mean ± SD        | 2.09 ± 2.23      | 2.72 ± 4.21      |                   | 2.39 ± 3.33      |
| PCB105                          | Median (p25–p75) | 1.10 (1.00–2.40) | 1.80 (1.00–2.98) | 0.38              | 1.60 (1.00–2.60) |
|                                 | Mean ± SD        | 11.8 ± 11.9      | 15.0 ± 25.9      |                   | 13.3 ± 19.5      |
| PCB118                          | Median (p25–p75) | 8.80 (5.45–13.0) | 9.10 (5.23–15.0) | 0.49              | 9.00 (5.40–14.0) |
|                                 | Mean ± SD        | 4.33 ± 4.10      | 5.05 ± 7.91      |                   | 4.65 ± 6.19      |
| PCB156                          | Median (p25–p75) | 3.10 (1.95–5.30) | 3.30 (2.00–5.48) | 0.97              | 3.20 (2.00–5.40) |
|                                 | Mean ± SD        | 18.2 ± 17.0      | 22.8 ± 36.5      |                   | 20.3 ± 27.5      |
| ΣDL-PCB                         | Median (p25–p75) | 13.8 (8.63–20.1) | 13.6 (8.30–24.3) | 0.55              | 14.1 (8.40–21.9) |
|                                 | Mean ± SD        | 252 ± 276        | 336 ± 738        |                   | 289 ± 537        |
| ΣPCB                            | Median (p25–p75) | 183 (115–272)    | 174 (119–283)    | 0.48              | 181 (117–279)    |
|                                 | Mean ± SD        | 0.08 ± 0.02      | 0.08 ± 0.02      |                   | 0.08 ± 0.02      |
| ΣDL-PCB/ΣPCB (%)                | Median (p25–p75) | 7.38 (6.30–8.86) | 7.61 (6.39–8.87) | 0.47              | 7.42 (6.35–8.85) |
|                                 | Mean ± SD        | 336 ± 395        | 473 ± 1222       |                   | 397 ± 873        |
| ΣOCP                            | Median (p25–p75) | 226 (147–386)    | 233 (140–425)    | 0.12              | 233 (143–391)    |
|                                 | Mean ± SD        | 588 ± 664        | 809 ± 1950       |                   | 687 ± 1401       |
| ΣLegacy POPs                    | Median (p25–p75) | 417 (268–639)    | 418 (268–690)    | 0.44              | 422 (270–674)    |
|                                 | Mean ± SD        | 606 ± 665        | 827 ± 1952       |                   | 704 ± 1403       |
| ΣLip POPs                       | Median (p25–p75) | 433(279–654)     | 432 (284–712)    | 0.44              | 436 (281–684)    |
| <b>Dioxin like activity</b>     | <b>n</b>         | 241              | 214              |                   | 456              |
|                                 | Mean ± SD        | 1.70 ± 1.68      | 1.73 ± 1.51      |                   | 1.72 ± 1.60      |
| AhR-TEQ (pg/ml serum)           | Median (p25–p75) | 1.24 (0.54–2.37) | 1.42 (0.56–2.42) | 0.89              | 1.32 (0.56–2.40) |
|                                 | n                | 236              | 210              |                   | 447              |
|                                 | Mean ± SD        | 119 ± 123        | 119 ± 118        |                   | 119 ± 121        |
| AhR-TEQ (pg/g serum lipid)      | Median (p25–p75) | 85.1 (37.1–159)  | 88.8 (33.9–160)  | 0.85              | 86.5 (35.0–160)  |
|                                 | n                | 237              | 211              |                   | 449              |
|                                 | Mean ± SD        | 7.33 ± 1.77      | 7.64 ± 1.86      |                   | 7.46 ± 1.80      |
| Serum lipid (g/l serum)         | Median (p25–p75) | 7.10 (5.95–8.55) | 7.30 (6.40–8.88) | 0.07 <sup>#</sup> | 7.2 (6.10–8.70)  |
| <b>Foetal growth indices</b>    | <b>n</b>         | 241              | 214              |                   | 456              |
|                                 | Mean ± SD        | 3677 ± 570       | 3467 ± 562       |                   | 3578 ± 545       |
| Birth weight (g)                | Median (p25–p75) | 3690 (3368–4010) | 3458 (3201–3798) | <b>0.001</b>      | 3618 (3275–3930) |

|                                     |                  |                  |                  |          |                  |
|-------------------------------------|------------------|------------------|------------------|----------|------------------|
| Birth length (cm)                   | n                | 241              | 214              | < 0.0001 | 456              |
|                                     | Mean ± SD        | 51.9 ± 2.51      | 50.7 ± 3.22      |          | 51.3 ± 2.92      |
|                                     | Median (p25–p75) | 52.0 (51.0–53.0) | 51.0 (50.0–52.0) |          | 51.0 (50.0–53.0) |
| Ponderal Index (g/cm <sup>3</sup> ) | n                | 241              | 214              | 0.24     | 456              |
|                                     | Mean ± SD        | 2.62 ± 0.25      | 2.66 ± 0.32      |          | 2.64 ± 0.28      |
|                                     | Median (p25–p75) | 2.60 (2.48–2.75) | 2.64 (1.97–5.68) |          | 2.62 (2.49–2.77) |
| Head circumference (cm)             | n                | 241              | 213              | < 0.0001 | 455              |
|                                     | Mean ± SD        | 34.9 ± 1.55      | 34.3 ± 1.85      |          | 34.6 ± 1.73      |
|                                     | Median (p25–p75) | 35.0 (34.0–36.0) | 34.0 (33.5–35.0) |          | 35.0 (34.0–36.0) |
| Gestational age at birth (week)     | n                | 232              | 209              | 0.25     | 441              |
|                                     | Mean ± SD        | 39.2 ± 1.65      | 39.0 ± 2.15      |          | 39.1 ± 1.90      |
|                                     | Median (p25–p75) | 39.0 (38.0–40.0) | 39.0 (38.0–40.0) |          | 39.0 (38.0–40.0) |

<sup>a</sup> One subject had no gender information. n: total number of participants having information for the parameter. p value was calculated with independent student t-test analysis on ln-transformed data. DL-PCB (dioxin-like PCB) included PCB105, PCB118 and PCB156; ΣLegacy POPs included 14 PCBs and 11 OCPs, ΣLip POPs: lipophilic POPs including 14 PCBs, 11 OCPs and 10 PBDEs. Bold value indicates statistical significance ( $p < 0.050$ ), <sup>#</sup> borderline significance ( $p < 0.080$ ). p25: 25<sup>th</sup> percentile. p75: 75<sup>th</sup> percentile.

**Table S2.** The detectable percentage of contaminants in ACCEPT Inuit pregnant women.

| Contaminant             | % over LOD | Contaminant                    | % over LOD |
|-------------------------|------------|--------------------------------|------------|
| <b>PCBs (n = 464)</b>   |            | <b>PBDEs and PBB (n = 464)</b> |            |
| PCB 138                 | 100        | PBDE 47                        | 4.44       |
| PCB 153                 | 100        | PBDE 153                       | 3.09       |
| PCB 180                 | 100        | PBDE 99                        | 2.94       |
| PCB 170                 | 99.0       | PBDE 100                       | 1.03       |
| PCB 118                 | 98.6       | PBB 153                        | 0.69       |
| PCB 187                 | 98.3       | PBDE 15                        | 0          |
| PCB 183                 | 82.1       | PBDE 17                        | 0          |
| PCB 156                 | 80.4       | PBDE 25                        | 0          |
| PCB 99                  | 72.5       | PBDE 28                        | 0          |
| PCB 105                 | 44.4       | PBDE 33                        | 0          |
| PCB 128                 | 15.6       |                                |            |
| PCB 101                 | 7.01       |                                |            |
| PCB 28                  | 6.30       |                                |            |
| PCB 52                  | 0          |                                |            |
| <b>OCPs (n = 464)</b>   |            | <b>Metals (n = 468)</b>        |            |
| Hexachlorobenzene (HCB) | 99.7       | Se                             | 100        |
| p,p'-DDE                | 99.3       | Plasma Se                      | 99.8       |
| Oxychlordane            | 98.3       | Hg                             | 78.6       |
| trans-Nonachlor         | 98.1       |                                |            |
| cis-Nonachlor           | 94.4       |                                |            |
| β-HCH                   | 91.0       |                                |            |
| Mirex                   | 70.6       |                                |            |
| p,p'-DDT                | 15.7       |                                |            |
| α-Chlordane             | 1.03       |                                |            |
| γ-Chlordane             | 0          |                                |            |
| Aldrin                  | 0          |                                |            |

LOD: limit of detection, PCB: Polychlorinated biphenyl, OCPs: Organochlorine pesticides, p,p'-DDE: Dichlorodiphenyldichloroethylene, β-HCH: β-hexachlorocyclohexane, p,p'-DDT: Dichlorodiphenyltrichloroethane, PBDEs: Polybrominated diphenyl ethers, PBB: Polybrominated biphenyl.

**Table S3.** Rotated factor loading of two components identified by principal component analysis (PCA) of the ACCEPT Greenlandic pregnant women.

| Interpreted variable component     | Variable name   | Factor loading <sup>a</sup> | Explained variance | Explained variance cumulative |
|------------------------------------|-----------------|-----------------------------|--------------------|-------------------------------|
| PC-1 (lipPOP component, µg/L)      | PCB153          | 0.990                       | 75.53%             | 75.53%                        |
|                                    | PCB138          | 0.982                       |                    |                               |
|                                    | PCB187          | 0.980                       |                    |                               |
|                                    | trans-nonachlor | 0.980                       |                    |                               |
|                                    | Mirex           | 0.978                       |                    |                               |
|                                    | oxychlordane    | 0.982                       |                    |                               |
|                                    | PCB183          | 0.971                       |                    |                               |
|                                    | p,p'-DDE        | 0.957                       |                    |                               |
|                                    | PCB180          | 0.969                       |                    |                               |
|                                    | PCB99           | 0.970                       |                    |                               |
|                                    | PCB118          | 0.952                       |                    |                               |
|                                    | PCB170          | 0.934                       |                    |                               |
|                                    | β-HCH           | 0.867                       |                    |                               |
|                                    | cis-nonachlor   | 0.903                       |                    |                               |
|                                    | PCB105          | 0.885                       |                    |                               |
|                                    | PCB156          | 0.856                       |                    |                               |
|                                    | HCB             | 0.801                       |                    |                               |
| PC-2 (fatty metal component, µg/L) | Se              | 0.874                       | 11.33%             | 86.85%                        |
|                                    | Hg              | 0.817                       |                    |                               |
|                                    | Plasma Se       | 0.544                       |                    |                               |

<sup>a</sup> Factor loadings are the correlation coefficients between the original variables (contaminants concentrations) and the extracted components. Variables are sorted by the size of the factor loading. Variables with factor loading below 0.40 are not listed. PC: principle component. The PCA was performed for the contaminants detected in above 40% samples.

**Table S4.** The associations of maternal serum AhR-TEQ (pg/g lipid) and foetal growth indices.

|                                     | Crude |                                                             |      | Adjusted <sup>a</sup> |                                                            |      | Adjusted <sup>b</sup> |                                                            |      |
|-------------------------------------|-------|-------------------------------------------------------------|------|-----------------------|------------------------------------------------------------|------|-----------------------|------------------------------------------------------------|------|
|                                     | n     | $\beta$ (95% CI)                                            | p    | n                     | $\beta$ (95% CI)                                           | p    | n                     | $\beta$ (95% CI)                                           | p    |
| Birth weight (g)                    | 447   | −0.30 (−0.74; 0.14)                                         | 0.18 | 256                   | −0.21 (−0.79; 0.36)                                        | 0.47 | 246                   | −0.11 (−0.54; 0.31)                                        | 0.60 |
| Birth length (cm)                   | 447   | −0.001 (−0.003; 0.001)                                      | 0.35 | 256                   | −0.001 (−0.004; 0.001)                                     | 0.32 | 246                   | −0.001 (−0.003; 0.001)                                     | 0.43 |
| Ponderal Index (g/cm <sup>3</sup> ) | 447   | −5.8e <sup>−5</sup> (−3e <sup>−4</sup> ; 2e <sup>−4</sup> ) | 0.60 | 256                   | 1.2e <sup>−5</sup> (−3e <sup>−4</sup> ; 3e <sup>−4</sup> ) | 0.94 | 246                   | 4.5e <sup>−7</sup> (−3e <sup>−4</sup> ; 3e <sup>−4</sup> ) | 0.99 |
| Head circumference (cm)             | 446   | −5.0e <sup>−4</sup> (−0.002; 0.001)                         | 0.51 | 256                   | −4.0e <sup>−4</sup> (−0.002; 0.001)                        | 0.66 | 231                   | −2.0e <sup>−4</sup> (−0.001; 0.001)                        | 0.81 |
| Gestational age at birth (week)     | 432   | −8.9e <sup>−5</sup> (−0.002; 0.001)                         | 0.91 | 246                   | 4.0e <sup>−4</sup> (−0.002; 0.001)                         | 0.81 | —                     | —                                                          | —    |

$\beta$  (95% CI): regression coefficient (95% confidential interval). <sup>a</sup>adjusted for maternal age (year), pre-pregnancy BMI (kg/m<sup>2</sup>), plasma cotinine, education level, alcohol intake during pregnancy and parity; <sup>b</sup>adjusted for maternal age (year), pre-pregnancy BMI (kg/m<sup>2</sup>), plasma cotinine, education level, alcohol intake during pregnancy, parity and gestational age at birth.

**Table S5.** The association of maternal serum (AhR-TEQ, pg/g lipid) and foetal growth indices stratified on gender in the ACCEPT cohort.

|                                         |                      | Crude |                                                             |                   | Adjusted <sup>a</sup> |                                                            |             | Adjusted <sup>b</sup> |                                                            |             |
|-----------------------------------------|----------------------|-------|-------------------------------------------------------------|-------------------|-----------------------|------------------------------------------------------------|-------------|-----------------------|------------------------------------------------------------|-------------|
|                                         | AhR-TEQ (pg/g lipid) | n     | β (95% CI)                                                  | p                 | n                     | β (95% CI)                                                 | p           | n                     | β (95% CI)                                                 | p           |
| <b>Male infant</b>                      |                      |       |                                                             |                   |                       |                                                            |             |                       |                                                            |             |
| Birth weight (BW)(g)                    | Continuous           | 236   | −0.52 (−1.10; 0.07)                                         | 0.08 <sup>‡</sup> | 127                   | −0.23 (−1.02; 0.57)                                        | 0.57        | 119                   | −0.13 (−0.72; 0.46)                                        | 0.67        |
|                                         | Q1 (0.224–34.20)     | 56    | 0 (reference)                                               |                   | 33                    | 0 (reference)                                              |             | 30                    | 0 (reference)                                              |             |
|                                         | Q2 (34.21–86.20)     | 65    | 118 (−63.4; 299)                                            | 0.20              | 40                    | 112 (−123; 350)                                            | 0.35        | 38                    | 120 (−133; 372)                                            | 0.35        |
|                                         | Q3 (86.21–159.8)     | 57    | 72.9 (−115; 261)                                            | 0.45              | 26                    | 169 (−150; 488)                                            | 0.30        | 25                    | 275 (−7.15; 557)                                           | 0.06#       |
|                                         | Q4 (> 159.8)         | 58    | −62.5 (−266; 141)                                           | 0.55              | 28                    | 21.0 (−294; 336)                                           | 0.90        | 26                    | −20.8 (−349; 308)                                          | 0.90        |
|                                         | p for trend          |       | 0.47                                                        |                   |                       | 0.81                                                       |             |                       | 0.88                                                       |             |
| Birth length (BL)(cm)                   | Continuous           | 236   | −0.002 (−0.005; 1e <sup>−4</sup> )                          | 0.06 <sup>‡</sup> | 127                   | −0.002 (−0.006; 0.001)                                     | 0.18        | 119                   | −0.002 (−0.005; 0.001)                                     | 0.18        |
|                                         | Q1 (0.224–34.20)     | 56    | 0 (reference)                                               |                   | 33                    | 0 (reference)                                              |             | 30                    | 0 (reference)                                              |             |
|                                         | Q2 (34.21–86.20)     | 65    | 0.46 (−0.26; 1.18)                                          | 0.21              | 40                    | 0.13 (−0.75; 1.00)                                         | 0.78        | 38                    | 0.05 (−0.89; 0.98)                                         | 0.92        |
|                                         | Q3 (86.21–159.8)     | 57    | −0.02 (−0.94; 0.90)                                         | 0.96              | 26                    | −0.46 (−2.05; 1.12)                                        | 0.57        | 25                    | 0.05 (−1.21; 1.30)                                         | 0.94        |
|                                         | Q4 (> 159.8)         | 58    | −0.58 (−1.46; 0.30)                                         | 0.20              | 28                    | −0.68 (−1.97; 0.61)                                        | 0.30        | 26                    | −0.92 (−2.27; 0.43)                                        | 0.18        |
|                                         | p for trend          |       | 0.12                                                        |                   |                       | 0.17                                                       |             |                       | 0.08#                                                      |             |
| Ponderal Index (PI)(g/cm <sup>3</sup> ) | Continuous           | 236   | −6.3e <sup>−5</sup> (−3e <sup>−4</sup> ; 2e <sup>−4</sup> ) | 0.63              | 127                   | 1.2e <sup>−4</sup> (−2e <sup>−4</sup> ; 5e <sup>−4</sup> ) | 0.49        | 119                   | 1.4e <sup>−4</sup> (−2e <sup>−4</sup> ; 4e <sup>−4</sup> ) | 0.38        |
|                                         | Q1 (0.224–34.20)     | 56    | 0 (reference)                                               |                   | 33                    | 0 (reference)                                              |             | 30                    | 0 (reference)                                              |             |
|                                         | Q2 (34.21–86.20)     | 65    | 0.003 (−0.09; 0.09)                                         | 0.95              | 40                    | 0.06 (−0.06; 0.17)                                         | 0.31        | 38                    | 0.10 (−0.03; 0.23)                                         | 0.20        |
|                                         | Q3 (86.21–159.8)     | 57    | 0.05 (−0.05; 0.14)                                          | 0.34              | 26                    | 0.18 (0.04; 0.31)                                          | <b>0.01</b> | 25                    | 0.19 (0.05; 0.33)                                          | <b>0.01</b> |
|                                         | Q4 (> 159.8)         | 58    | 0.02 (−0.08; 0.11)                                          | 0.72              | 28                    | 0.09 (−0.03; 0.21)                                         | 0.14        | 26                    | 0.02 (−0.11; 0.16)                                         | 0.13        |
|                                         | p for trend          |       | 0.51                                                        |                   |                       | <b>0.03</b>                                                |             |                       | <b>0.02</b>                                                |             |
| Head circumference (HC)(cm)             | Continuous           | 236   | −0.001 (−0.003; 3e <sup>−4</sup> )                          | 0.10              | 127                   | −0.001 (−0.003; 0.001)                                     | 0.33        | 119                   | −0.001 (−0.002; 0.001)                                     | 0.30        |
|                                         | Q1 (0.224–34.20)     | 56    | 0 (reference)                                               |                   | 33                    | 0 (reference)                                              |             | 30                    | 0 (reference)                                              |             |
|                                         | Q2 (34.21–86.20)     | 65    | 0.30 (−0.20; 0.80)                                          | 0.25              | 40                    | 0.45 (−0.21; 1.11)                                         | 0.18        | 38                    | 0.45 (−0.25; 1.16)                                         | 0.21        |
|                                         | Q3 (86.21–159.8)     | 57    | 0.08 (−0.44; 0.59)                                          | 0.77              | 26                    | 0.25 (−0.61; 1.11)                                         | 0.57        | 25                    | 0.52 (−0.20; 1.24)                                         | 0.16        |
|                                         | Q4 (> 159.8)         | 58    | −0.24 (−0.84; 0.35)                                         | 0.42              | 28                    | −0.04 (−0.82; 0.73)                                        | 0.91        | 26                    | −0.17 (−0.98; 0.64)                                        | 0.68        |
|                                         | p for trend          |       | 0.28                                                        |                   |                       | 0.77                                                       |             |                       | 0.55                                                       |             |
| Gestational age at birth (GA) (week)    | Continuous           | 227   | −4.0e <sup>−4</sup> (−0.002; 0.001)                         | 0.62              | 119                   | −3.4e <sup>−4</sup> (−0.003; 0.002)                        | 0.76        | —                     | —                                                          | —           |
|                                         | Q1 (0.224–34.20)     | 52    | 0 (reference)                                               |                   | 30                    | 0 (reference)                                              |             | —                     | —                                                          | —           |
|                                         | Q2 (34.21–86.20)     | 63    | −0.02 (−0.61; 0.58)                                         | 0.96              | 38                    | 0.13 (−0.73; 0.99)                                         | 0.76        | —                     | —                                                          | —           |
|                                         | Q3 (86.21–159.8)     | 56    | 0.58 (−0.02; 1.18)                                          | 0.06#             | 25                    | 0.89 (0.00; 1.79)                                          | <b>0.05</b> | —                     | —                                                          | —           |
|                                         | Q4 (> 159.8)         | 56    | −0.09 (−0.75; 0.57)                                         | 0.78              | 26                    | −0.10 (−0.99; 0.79)                                        | 0.83        | —                     | —                                                          | —           |
|                                         | p for trend          |       | 0.96                                                        |                   |                       | 0.87                                                       |             | —                     | —                                                          | —           |
| <b>Female infant</b>                    |                      |       |                                                             |                   |                       |                                                            |             |                       |                                                            |             |
| Birth weight (g)                        | Continuous           | 210   | −0.03 (−0.68; 0.63)                                         | 0.94              | 129                   | −0.34 (−1.22; 0.53)                                        | 0.44        | 127                   | −0.14 (−0.77; 0.49)                                        | 0.66        |
|                                         | Q1 (0.224–34.20)     | 56    | 0 (reference)                                               |                   | 31                    | 0 (reference)                                              |             | 31                    | 0 (reference)                                              |             |
|                                         | Q2 (34.21–86.20)     | 48    | 37.3 (−186; 267)                                            | 0.74              | 36                    | 6.79 (−231; 245)                                           | 0.96        | 34                    | 40.8 (−199; 280)                                           | 0.74        |
|                                         | Q3 (86.21–159.8)     | 55    | 87.4 (−142; 317)                                            | 0.46              | 39                    | 40.2 (−227; 307)                                           | 0.77        | 39                    | 40.2 (−227; 307)                                           | 0.77        |
|                                         | Q4 (> 159.8)         | 51    | 39.5 (−181; 261)                                            | 0.73              | 23                    | −61.0 (−319; 197)                                          | 0.64        | 23                    | −61.0 (−319; 197)                                          | 0.64        |
|                                         | p for trend          |       | 0.61                                                        |                   |                       | 0.75                                                       |             |                       | 0.76                                                       |             |
| Birth length (cm)                       | Continuous           | 210   | 0.001 (−0.003; 0.004)                                       | 0.70              | 129                   | −0.001 (−0.007; 0.004)                                     | 0.60        | 127                   | −1.0e <sup>−4</sup> (−0.004; 0.004)                        | 0.95        |
|                                         | Q1 (0.224–34.20)     | 56    | 0 (reference)                                               |                   | 31                    | 0 (reference)                                              |             | 31                    | 0 (reference)                                              |             |
|                                         | Q2 (34.21–86.20)     | 48    | 0.52 (−0.64; 1.69)                                          | 0.38              | 36                    | 0.16 (−0.87; 1.19)                                         | 0.76        | 34                    | 0.27 (−0.77; 1.31)                                         | 0.62        |
|                                         | Q3 (86.21–159.8)     | 55    | 0.51 (−0.97; 2.00)                                          | 0.50              | 39                    | −0.06 (−1.74; 1.63)                                        | 0.95        | 39                    | −0.06 (−1.74; 1.63)                                        | 0.95        |
|                                         | Q4 (> 159.8)         | 51    | 0.54 (−0.62; 1.69)                                          | 0.36              | 23                    | 0.007 (−1.14; 1.16)                                        | 0.99        | 23                    | 0.007 (−1.14; 1.16)                                        | 0.99        |
|                                         | p for trend          |       | 0.41                                                        |                   |                       | 0.87                                                       |             |                       | 0.56                                                       |             |
| Ponderal Index (g/cm <sup>3</sup> )     | Continuous           | 210   | −6.5e <sup>−5</sup> (−4e <sup>−4</sup> ; 3e <sup>−4</sup> ) | 0.73              | 129                   | 3.1e <sup>−5</sup> (−0.001; 0.001)                         | 0.92        | 127                   | −1.1e <sup>−4</sup> (−0.001; 5e <sup>−4</sup> )            | 0.71        |

|                                 |                    |     |                                    |      |     |                                     |      |     |                                    |      |
|---------------------------------|--------------------|-----|------------------------------------|------|-----|-------------------------------------|------|-----|------------------------------------|------|
|                                 | Q1 (0.224–34.20)   | 56  | 0 (reference)                      |      | 31  | 0 (reference)                       |      | 31  | 0 (reference)                      |      |
|                                 | Q2 (34.21–86.20)   | 48  | −0.03 (−0.11; 0.05)                | 0.47 | 36  | −0.03 (−0.13; 0.08)                 | 0.61 | 34  | −0.02 (−0.13; 0.09)                | 0.76 |
|                                 | Q3 (86.21–159.8)   | 55  | 0.04 (−0.10; 0.18)                 | 0.59 | 39  | 0.06 (−0.13; 0.25)                  | 0.52 | 39  | 0.06 (−0.13; 0.25)                 | 0.52 |
|                                 | Q4 (> 159.8)       | 51  | −0.02 (−0.12; 0.07)                | 0.65 | 23  | −0.04 (−0.19; 0.10)                 | 0.55 | 23  | −0.04 (−0.90; 0.10)                | 0.55 |
|                                 | <i>p</i> for trend |     | 0.99                               |      |     | 0.98                                |      |     | 0.74                               |      |
| Head circumference (cm)         | Continuous         | 209 | 0.001 (−0.001; 0.003)              | 0.52 | 129 | −1.0e <sup>−4</sup> (−0.003; 0.003) | 0.94 | 127 | 4.0e <sup>−4</sup> (−0.002; 0.003) | 0.72 |
|                                 | Q1 (0.224–34.20)   | 56  | 0 (reference)                      |      | 31  | 0 (reference)                       |      | 31  | 0 (reference)                      |      |
|                                 | Q2 (34.21–86.20)   | 47  | 0.32 (−0.46; 1.10)                 | 0.43 | 36  | 0.24 (−0.53; 0.99)                  | 0.55 | 34  | 0.32 (−0.45; 1.09)                 | 0.42 |
|                                 | Q3 (86.21–159.8)   | 55  | 0.44 (−0.34; 1.22)                 | 0.27 | 39  | 0.11 (−0.72; 0.94)                  | 0.79 | 39  | 0.11 (−0.72; 0.94)                 | 0.79 |
|                                 | Q4 (> 159.8)       | 51  | 0.35 (−0.36; 1.05)                 | 0.34 | 23  | 0.18 (−0.59; 0.96)                  | 0.65 | 23  | 0.18 (−0.60; 0.96)                 | 0.65 |
|                                 | <i>p</i> for trend |     | 0.29                               |      |     | 0.93                                |      |     | 0.54                               |      |
| Gestational age at birth (week) | Continuous         | 205 | 3.0e <sup>−4</sup> (−0.002; 0.003) | 0.80 | 127 | −0.001 (−0.004; 0.002)              | 0.50 | –   | –                                  | –    |
|                                 | Q1 (0.224–34.20)   | 56  | 0 (reference)                      |      | 31  | 0 (reference)                       |      | –   | –                                  | –    |
|                                 | Q2 (34.21–86.20)   | 44  | 0.25 (−0.63; 1.12)                 | 0.58 | 34  | −0.009 (−0.73; 0.71)                | 0.98 | –   | –                                  | –    |
|                                 | Q3 (86.21–159.8)   | 54  | 0.22 (−0.76; 1.19)                 | 0.67 | 39  | −0.40 (−1.37; 0.56)                 | 0.41 | –   | –                                  | –    |
|                                 | Q4 (> 159.8)       | 51  | 0.34 (−0.50; 1.18)                 | 0.43 | 23  | −0.18 (−0.93; 0.57)                 | 0.63 | –   | –                                  | –    |
|                                 | <i>p</i> for trend |     | 0.45                               |      |     | 0.45                                |      | –   | –                                  | –    |

β (95% CI): regression coefficient (95% confidential interval). <sup>a</sup>adjusted for maternal age (year), pre-pregnancy BMI (kg/m<sup>2</sup>), plasma cotinine, educational level, alcohol intake during pregnancy, parity; <sup>b</sup>adjusted for maternal age (year), pre-pregnancy BMI (kg/m<sup>2</sup>), plasma cotinine, education level, alcohol intake during pregnancy, parity, gestational age at birth. Bold value indicates statistical significance (*p* ≤ 0.050), # borderline significance (*p* ≤ 0.080).

**Table S6.** The association of maternal serum AhR-TEQ (pg/g lipid) and foetal growth indices stratified on smoking history of the ACCEPT cohort.

|                                     |                      | Crude |                                                                 |             | Adjusted <sup>a</sup> |                                                               |             | Adjusted <sup>b</sup> |                                                                |             |
|-------------------------------------|----------------------|-------|-----------------------------------------------------------------|-------------|-----------------------|---------------------------------------------------------------|-------------|-----------------------|----------------------------------------------------------------|-------------|
|                                     | AhR-TEQ (pg/g lipid) | n     | β (95% CI)                                                      | p           | n                     | β (95% CI)                                                    | p           | n                     | β (95% CI)                                                     | p           |
| <b>Never smokers</b>                |                      |       |                                                                 |             |                       |                                                               |             |                       |                                                                |             |
| Birth weight (g)                    | Continuous           | 107   | −0.21 (−1.10; 0.68)                                             | 0.64        | 81                    | 0.19 (−0.84; 1.21)                                            | 0.72        | 76                    | 0.25 (−0.63; 1.12)                                             | 0.57        |
|                                     | Q1 (0.224–34.20)     | 31    | 0 (reference)                                                   |             | 25                    | 0 (reference)                                                 |             | 24                    | 0 (reference)                                                  |             |
|                                     | Q2 (34.21–86.20)     | 29    | 28.1 (−213; 269)                                                | 0.82        | 24                    | 39.4 (−200; 279)                                              | 0.75        | 21                    | 68.1 (−176; 313)                                               | 0.59        |
|                                     | Q3 (86.21–159.8)     | 22    | −61.7 (−415; 291)                                               | 0.73        | 19                    | −27.6 (−412; 357)                                             | 0.89        | 18                    | 94.3 (−234; 422)                                               | 0.57        |
|                                     | Q4 (> 159.8)         | 25    | −131 (−411; 149)                                                | 0.36        | 13                    | −57.9 (−399; 284)                                             | 0.74        | 13                    | −53.5 (−398; 291)                                              | 0.76        |
|                                     | p for trend          |       | 0.33                                                            |             |                       | 0.66                                                          |             |                       | 0.98                                                           |             |
| Birth length (cm)                   | Continuous           | 107   | −2.2e <sup>−4</sup> (−0.005; 0.004)                             | 0.92        | 81                    | 3.9e <sup>−4</sup> (−0.005; 0.005)                            | 0.88        | 76                    | 0.001 (−0.003; 0.005)                                          | 0.73        |
|                                     | Q1 (0.224–34.20)     | 31    | 0 (reference)                                                   |             | 25                    | 0 (reference)                                                 |             | 24                    | 0 (reference)                                                  |             |
|                                     | Q2 (34.21–86.20)     | 29    | 0.37 (−0.79; 1.53)                                              | 0.53        | 24                    | 0.04 (−1.01; 1.09)                                            | 0.94        | 21                    | 0.06 (−1.01; 1.13)                                             | 0.91        |
|                                     | Q3 (86.21–159.8)     | 22    | −0.95 (−2.82; 0.92)                                             | 0.32        | 19                    | −1.47 (−3.43; 0.49)                                           | 0.14        | 18                    | −0.86 (−2.37; 0.65)                                            | 0.26        |
|                                     | Q4 (> 159.8)         | 25    | −0.42 (−1.71; 0.86)                                             | 0.52        | 13                    | −0.46 (−1.95; 1.02)                                           | 0.54        | 13                    | −0.55 (−2.03; 0.94)                                            | 0.47        |
|                                     | p for trend          |       | 0.30                                                            |             |                       | 0.28                                                          |             |                       | 0.39                                                           |             |
| Ponderal Index (g/cm <sup>3</sup> ) | Continuous           | 107   | −1.5e <sup>−4</sup> (−0.001; 2.1e <sup>−4</sup> )               | 0.41        | 81                    | −2.1e <sup>−5</sup> (−3.9e <sup>−4</sup> ; 3e <sup>−4</sup> ) | 0.92        | 76                    | 3.3e <sup>−5</sup> (−3.6e <sup>−4</sup> ; 4.3e <sup>−4</sup> ) | 0.87        |
|                                     | Q1 (0.224–34.20)     | 31    | 0 (reference)                                                   |             | 25                    | 0 (reference)                                                 |             | 24                    | 0 (reference)                                                  |             |
|                                     | Q2 (34.21–86.20)     | 29    | −0.04 (−0.14; 0.06)                                             | 0.46        | 24                    | 0.02 (−0.10; 0.13)                                            | 0.79        | 21                    | 0.04 (−0.08; 0.15)                                             | 0.53        |
|                                     | Q3 (86.21–159.8)     | 22    | 0.08 (−0.07; 0.24)                                              | 0.29        | 19                    | 0.17 (0.02; 0.33)                                             | <b>0.03</b> | 18                    | 0.19 (0.04; 0.35)                                              | <b>0.02</b> |
|                                     | Q4 (> 159.8)         | 25    | −0.05 (−0.15; 0.06)                                             | 0.38        | 13                    | 0.01 (−0.11; 0.13)                                            | 0.88        | 13                    | 0.03 (−0.10; 0.15)                                             | 0.67        |
|                                     | p for trend          |       | 0.91                                                            |             |                       | 0.39                                                          |             |                       | 0.27                                                           |             |
| Head circumference (cm)             | Continuous           | 107   | −0.001 (−0.003; 0.002)                                          | 0.61        | 81                    | 2.0e <sup>−4</sup> (−0.003; 0.003)                            | 0.89        | 76                    | −3.6e <sup>−4</sup> (−0.002; 0.003)                            | 0.77        |
|                                     | Q1 (0.224–34.20)     | 31    | 0 (reference)                                                   |             | 25                    | 0 (reference)                                                 |             | 24                    | 0 (reference)                                                  |             |
|                                     | Q2 (34.21–86.20)     | 29    | 0.34 (−0.38; 1.06)                                              | 0.35        | 24                    | 0.55 (−0.22; 1.31)                                            | 0.16        | 21                    | 0.63 (−0.19; 1.44)                                             | 0.13        |
|                                     | Q3 (86.21–159.8)     | 22    | −0.19 (−1.16; 0.78)                                             | 0.71        | 19                    | −0.08 (−1.16; 0.99)                                           | 0.88        | 18                    | 0.30 (−0.57; 1.17)                                             | 0.50        |
|                                     | Q4 (> 159.8)         | 25    | −0.35 (−1.09; 0.39)                                             | 0.35        | 13                    | −0.003 (−0.77; 0.77)                                          | 0.99        | 13                    | 0.01 (−0.77; 0.80)                                             | 0.97        |
|                                     | p for trend          |       | 0.26                                                            |             |                       | 0.77                                                          |             |                       | 0.95                                                           |             |
| Gestational age at birth (week)     | Continuous           | 102   | −0.001 (−0.003; 0.002)                                          | 0.67        | 76                    | 3.1e <sup>−4</sup> (−0.002; 0.003)                            | 0.81        | —                     | —                                                              | —           |
|                                     | Q1 (0.224–34.20)     | 30    | 0 (reference)                                                   |             | 24                    | 0 (reference)                                                 |             | —                     | —                                                              | —           |
|                                     | Q2 (34.21–86.20)     | 26    | −0.03 (−0.89; 0.83)                                             | 0.94        | 21                    | −0.25 (−1.07; 0.57)                                           | 0.55        | —                     | —                                                              | —           |
|                                     | Q3 (86.21–159.8)     | 21    | 0.27 (−0.60; 1.14)                                              | 0.54        | 18                    | 0.25 (−0.60; 1.10)                                            | 0.56        | —                     | —                                                              | —           |
|                                     | Q4 (> 159.8)         | 25    | −0.30 (−1.15; 0.55)                                             | 0.49        | 13                    | −0.25 (−1.01; 0.51)                                           | 0.52        | —                     | —                                                              | —           |
|                                     | p for trend          |       | 0.65                                                            |             |                       | 0.77                                                          |             |                       |                                                                |             |
| <b>Previous smokers</b>             |                      |       |                                                                 |             |                       |                                                               |             |                       |                                                                |             |
| Birth weight (g)                    | Continuous           | 172   | −0.76 (−1.44; 0.09)                                             | <b>0.03</b> | 85                    | −1.43 (−2.41; −0.44)                                          | <b>0.01</b> | 83                    | −0.84 (−1.60; −0.08)                                           | <b>0.03</b> |
|                                     | Q1 (0.224–34.20)     | 45    | 0 (reference)                                                   |             | 16                    | 0 (reference)                                                 |             | 16                    | 0 (reference)                                                  |             |
|                                     | Q2 (34.21–86.20)     | 39    | 201 (−19.4; 422)                                                | 0.07#       | 23                    | 120 (−165; 404)                                               | 0.41        | 22                    | 114 (−178; 406)                                                | 0.44        |
|                                     | Q3 (86.21–159.8)     | 45    | 103 (−75.1; 281)                                                | 0.26        | 22                    | 141 (−103; 385)                                               | 0.26        | 22                    | 141 (−103; 385)                                                | 0.26        |
|                                     | Q4 (> 159.8)         | 43    | −100 (−332; 132)                                                | 0.40        | 24                    | −155 (−464; 155)                                              | 0.33        | 23                    | −173 (−489; 143)                                               | 0.28        |
|                                     | p for trend          |       | 0.30                                                            |             |                       | 0.34                                                          |             |                       | 0.28                                                           |             |
| Birth length (cm)                   | Continuous           | 172   | −0.003 (−0.006; −7.2e <sup>−4</sup> )                           | <b>0.05</b> | 85                    | −0.006 (−0.01; −0.002)                                        | <b>0.01</b> | 83                    | −0.004 (−0.008; −3.2e <sup>−4</sup> )                          | <b>0.05</b> |
|                                     | Q1 (0.224–34.20)     | 45    | 0 (reference)                                                   |             | 16                    | 0 (reference)                                                 |             | 16                    | 0 (reference)                                                  |             |
|                                     | Q2 (34.21–86.20)     | 39    | 0.94 (0.02; 1.85)                                               | <b>0.05</b> | 23                    | 0.47 (−0.77; 1.72)                                            | 0.46        | 22                    | 0.44 (−0.82; 1.71)                                             | 0.49        |
|                                     | Q3 (86.21–159.8)     | 45    | 0.64 (−0.18; 1.47)                                              | 0.13        | 22                    | 0.49 (−0.73; 1.71)                                            | 0.43        | 22                    | 0.49 (−0.73; 1.71)                                             | 0.43        |
|                                     | Q4 (> 159.8)         | 43    | −0.46 (−1.51; 0.59)                                             | 0.39        | 24                    | −0.75 (−2.24; 0.74)                                           | 0.32        | 23                    | −0.83 (−2.35; 0.68)                                            | 0.28        |
|                                     | p for trend          |       | 0.33                                                            |             |                       | 0.32                                                          |             |                       | 0.32                                                           |             |
| Ponderal Index (g/m <sup>3</sup> )  | Continuous           | 172   | −1.1e <sup>−4</sup> (−4.3e <sup>−4</sup> ; 2.1e <sup>−4</sup> ) | 0.51        | 85                    | −1.4e <sup>−4</sup> (−0.001; 3.4e <sup>−4</sup> )             | 0.57        | 83                    | 0.003 (−0.01; 0.02)                                            | 0.60        |
|                                     | Q1 (0.224–34.20)     | 45    | 0 (reference)                                                   |             | 16                    | 0 (reference)                                                 |             | 16                    | 0 (reference)                                                  |             |

|                                         |                    |     |                                                            |             |    |                                      |             |    |                                       |             |
|-----------------------------------------|--------------------|-----|------------------------------------------------------------|-------------|----|--------------------------------------|-------------|----|---------------------------------------|-------------|
|                                         | Q2 (34.21–86.20)   | 39  | −0.009 (−0.10; 0.08)                                       | 0.84        | 23 | 0.002 (−0.12; 0.12)                  | 0.97        | 22 | 0.003 (−0.12; 0.13)                   | 0.97        |
|                                         | Q3 (86.21–159.8)   | 45  | −0.02 (−0.12; 0.08)                                        | 0.71        | 22 | 0.03 (−0.11; 0.17)                   | 0.67        | 22 | 0.03 (−0.11; 0.17)                    | 0.67        |
|                                         | Q4 (> 159.8)       | 43  | −0.02 (−0.13; 0.09)                                        | 0.76        | 24 | −0.01 (−0.15; 0.13)                  | 0.91        | 23 | −0.01 (−0.16; 0.14)                   | 0.90        |
|                                         | <i>p</i> for trend |     | 0.70                                                       |             |    | 0.89                                 |             |    | 0.93                                  |             |
| Head circumference (cm)                 | Continuous         | 172 | −0.002 (−0.004; 3.2e <sup>−4</sup> )                       | 0.10        | 85 | −0.003 (−0.006; −0.001)              | <b>0.01</b> | 83 | −0.003 (−0.005; −2.5e <sup>−4</sup> ) | <b>0.05</b> |
|                                         | Q1 (0.224–34.20)   | 45  | 0 (reference)                                              |             | 16 | 0 (reference)                        |             | 16 | 0 (reference)                         |             |
|                                         | Q2 (34.21–86.20)   | 39  | 0.40 (−0.23; 1.03)                                         | 0.21        | 23 | −0.05 (−0.89; 0.79)                  | 0.91        | 22 | 0.01 (−0.84; 0.87)                    | 0.98        |
|                                         | Q3 (86.21–159.8)   | 45  | 0.33 (−0.16; 0.82)                                         | 0.18        | 22 | 0.15 (−0.55; 0.84)                   | 0.68        | 22 | 0.15 (−0.55; 0.84)                    | 0.68        |
|                                         | Q4 (> 159.8)       | 43  | −0.28 (−0.96; 0.40)                                        | 0.42        | 24 | −0.69 (−1.53; 0.15)                  | 0.11        | 23 | −0.70 (−1.56; 0.16)                   | 0.11        |
|                                         | <i>p</i> for trend |     | 0.42                                                       |             |    | 0.11                                 |             |    | 0.10                                  |             |
| Gestational age at birth (week)         | Continuous         | 169 | −0.002 (−0.004; 1.8e <sup>−4</sup> )                       | 0.07#       | 83 | −0.003 (−0.006; 3.5e <sup>−4</sup> ) | 0.08#       | –  | –                                     | –           |
|                                         | Q1 (0.224–34.20)   | 45  | 0 (reference)                                              |             | 16 | 0 (reference)                        |             | –  | –                                     | –           |
|                                         | Q2 (34.21–86.20)   | 38  | 0.06 (−0.59; 0.70)                                         | 0.86        | 22 | 0.13 (−0.89; 1.14)                   | 0.81        | –  | –                                     | –           |
|                                         | Q3 (86.21–159.8)   | 44  | 0.69 (0.10; 1.28)                                          | <b>0.02</b> | 22 | 0.44 (−0.54; 1.43)                   | 0.38        | –  | –                                     | –           |
|                                         | Q4 (> 159.8)       | 42  | −0.34 (−1.05; 0.38)                                        | 0.36        | 23 | −0.38 (−1.37; 0.62)                  | 0.46        | –  | –                                     | –           |
|                                         | <i>p</i> for trend |     | 0.77                                                       |             |    | 0.73                                 |             |    |                                       |             |
| <b>Current smokers during pregnancy</b> |                    |     |                                                            |             |    |                                      |             |    |                                       |             |
| Birth weight (g)                        | Continuous         | 163 | 0.07 (−0.64; 0.78)                                         | 0.84        | 93 | −0.15 (−1.08; 0.77)                  | 0.75        | 89 | −0.09 (−0.69; 0.51)                   | 0.77        |
|                                         | Q1 (0.224–34.20)   | 37  | 0 (reference)                                              |             | 24 | 0 (reference)                        |             | 22 | 0 (reference)                         |             |
|                                         | Q2 (34.21–86.20)   | 44  | 139 (−118; 395)                                            | 0.29        | 31 | 69.3 (−201; 340)                     | 0.62        | 30 | 123 (−158; 403)                       | 0.39        |
|                                         | Q3 (86.21–159.8)   | 41  | 182 (−96.3; 461)                                           | 0.20        | 24 | 89.0 (−269; 447)                     | 0.63        | 24 | 133 (−231; 496)                       | 0.47        |
|                                         | Q4 (> 159.8)       | 41  | 206 (−57.5; 469)                                           | 0.13        | 14 | 62.0 (−348; 473)                     | 0.77        | 13 | 2.49 (−382; 387)                      | 0.99        |
|                                         | <i>p</i> for trend |     | 0.12                                                       |             |    | 0.37                                 |             |    | 0.10                                  |             |
| Birth length (cm)                       | Continuous         | 163 | 4.6e <sup>−4</sup> (−0.004; 0.005)                         | 0.83        | 93 | −0.001 (−0.007; 0.004)               | 0.67        | 89 | −0.001 (−0.005; 0.003)                | 0.70        |
|                                         | Q1 (0.224–34.20)   | 37  | 0 (reference)                                              |             | 24 | 0 (reference)                        |             | 22 | 0 (reference)                         |             |
|                                         | Q2 (34.21–86.20)   | 44  | 0.89 (−0.54; 2.31)                                         | 0.22        | 31 | 0.37 (−0.72; 1.47)                   | 0.50        | 30 | 0.60 (−0.53; 1.73)                    | 0.30        |
|                                         | Q3 (86.21–159.8)   | 41  | 0.81 (−1.12; 2.74)                                         | 0.41        | 24 | −0.08 (−2.59; 2.42)                  | 0.95        | 24 | 0.13 (−2.39; 2.64)                    | 0.92        |
|                                         | Q4 (> 159.8)       | 41  | 0.96 (−0.50; 2.41)                                         | 0.20        | 14 | 0.15 (−1.36; 1.65)                   | 0.85        | 13 | 7.44e−15 (−1.42; 1.42)                | 1.00        |
|                                         | <i>p</i> for trend |     | 0.27                                                       |             |    | 0.94                                 |             |    | 0.57                                  |             |
| Ponderal Index (g/m <sup>3</sup> )      | Continuous         | 163 | 1.4e <sup>−5</sup> (−4e <sup>−4</sup> ; 4e <sup>−4</sup> ) | 0.95        | 93 | 2.31e <sup>−5</sup> (−0.001; 0.001)  | 0.95        | 89 | −6.2e <sup>−6</sup> (−0.001; 0.001)   | 0.99        |
|                                         | Q1 (0.224–34.20)   | 37  | 0 (reference)                                              |             | 24 | 0 (reference)                        |             | 22 | 0 (reference)                         |             |
|                                         | Q2 (34.21–86.20)   | 44  | 7.8e <sup>−5</sup> (−0.11; 0.11)                           | 0.99        | 31 | −0.01 (−0.16; 0.15)                  | 0.94        | 30 | 3.65e <sup>−4</sup> (−0.16; 0.16)     | 0.99        |
|                                         | Q3 (86.21–159.8)   | 41  | 0.08 (−0.11; 0.26)                                         | 0.42        | 24 | 0.12 (−0.17; 0.42)                   | 0.41        | 24 | 0.13 (−0.17; 0.43)                    | 0.41        |
|                                         | Q4 (> 159.8)       | 41  | 0.04 (−0.08; 0.16)                                         | 0.50        | 14 | 0.002 (−0.19; 0.20)                  | 0.99        | 13 | −0.01 (−0.22; 0.19)                   | 0.89        |
|                                         | <i>p</i> for trend |     | 0.42                                                       |             |    | 0.38                                 |             |    | 0.53                                  |             |
| Head circumference (cm)                 | Continuous         | 162 | 0.001 (−0.002; 0.003)                                      | 0.49        | 93 | 3.0e <sup>−4</sup> (−0.003; 0.003)   | 0.83        | 89 | 3.6e <sup>−4</sup> (−0.002; 0.002)    | 0.72        |
|                                         | Q1 (0.224–34.20)   | 37  | 0 (reference)                                              |             | 24 | 0 (reference)                        |             | 22 | 0 (reference)                         |             |
|                                         | Q2 (34.21–86.20)   | 43  | 0.62 (−0.33; 1.56)                                         | 0.20        | 31 | 0.51 (−0.27; 1.28)                   | 0.20        | 30 | 0.65 (−0.15; 1.46)                    | 0.11        |
|                                         | Q3 (86.21–159.8)   | 41  | 0.58 (−0.43; 1.58)                                         | 0.26        | 24 | 0.17 (−0.91; 1.25)                   | 0.76        | 24 | 0.24 (−0.86; 1.34)                    | 0.67        |
|                                         | Q4 (> 159.8)       | 41  | 0.76 (−0.17; 1.69)                                         | 0.11        | 14 | 0.58 (−0.51; 1.66)                   | 0.30        | 13 | 0.40 (−0.65; 1.45)                    | 0.45        |
|                                         | <i>p</i> for trend |     | 0.11                                                       |             |    | 0.28                                 |             |    | 0.11                                  |             |
| Gestational age at birth (week)         | Continuous         | 156 | 0.002 (−0.001; 0.005)                                      | 0.19        | 89 | −2.3e <sup>−4</sup> (−0.004; 0.003)  | 0.90        | –  | –                                     | –           |
|                                         | Q1 (0.224–34.20)   | 34  | 0 (reference)                                              |             | 22 | 0 (reference)                        |             | –  | –                                     | –           |
|                                         | Q2 (34.21–86.20)   | 42  | 0.56 (−0.66; 1.78)                                         | 0.37        | 30 | 0.17 (−0.86; 1.19)                   | 0.75        | –  | –                                     | –           |
|                                         | Q3 (86.21–159.8)   | 41  | 0.41 (−0.96; 1.78)                                         | 0.56        | 24 | −0.21 (−1.68; 1.27)                  | 0.78        | –  | –                                     | –           |
|                                         | Q4 (> 159.8)       | 39  | 0.95 (−0.27; 2.17)                                         | 0.13        | 13 | −0.12 (−1.33; 1.10)                  | 0.85        | –  | –                                     | –           |
|                                         | <i>p</i> for trend |     | 0.13                                                       |             |    | 0.67                                 |             |    |                                       |             |

β (95% CI): regression coefficient (95% confidential interval). <sup>a</sup>adjusted for maternal age (year), pre-pregnancy BMI (kg/m<sup>2</sup>), educational level, alcohol intake during pregnancy and parity; <sup>b</sup>adjusted for maternal age (year), pre-pregnancy BMI

(kg/m<sup>2</sup>), education level, alcohol intake during pregnancy, parity and gestational age at birth. Bold indicates statistical significance ( $p \leq 0.050$ ), # borderline significance ( $p \leq 0.080$ ).

**Table S7.** The association of serum AhR-TEQ (pg/g lipid) and foetal growth indices stratified by gestation age in ACCEPT cohort.

| AhR-TEQ (pg/g lipid)                              |                  | Crude |                                                             |                   | Adjusted <sup>a</sup> |                                                             |      |
|---------------------------------------------------|------------------|-------|-------------------------------------------------------------|-------------------|-----------------------|-------------------------------------------------------------|------|
|                                                   |                  | n     | $\beta$ (95% CI)                                            | p                 | n                     | $\beta$ (95% CI)                                            | p    |
| <b>Gestational age <math>\geq 37</math> weeks</b> |                  |       |                                                             |                   |                       |                                                             |      |
| Birth weight (g)                                  | Continuous       | 408   | −0.42 (−0.81; −0.03)                                        | <b>0.04</b>       | 230                   | −0.25 (−0.77; 0.28)                                         | 0.35 |
|                                                   | Q1 (0.224–34.20) | 94    | 0 (reference)                                               |                   | 56                    | 0 (reference)                                               |      |
|                                                   | Q2 (34.21–86.20) | 103   | 76.1 (−63.1; 215)                                           | 0.28              | 66                    | 89.0 (−81.7; 260)                                           | 0.31 |
|                                                   | Q3 (86.21–159.8) | 106   | 71.4 (−55.0; 198)                                           | 0.27              | 61                    | 133 (−43.5; 310)                                            | 0.14 |
|                                                   | Q4 (> 159.8)     | 105   | −40.1 (−175; 94.7)                                          | 0.56              | 47                    | −53.3 (−259; 152)                                           | 0.61 |
|                                                   | p for trend      |       | 0.53                                                        |                   |                       | 0.88                                                        |      |
| Birth length (cm)                                 | Continuous       | 408   | −0.002 (−0.003; 2e <sup>−4</sup> )                          | 0.07 <sup>#</sup> | 230                   | −0.001 (−0.004; 0.001)                                      | 0.24 |
|                                                   | Q1 (0.224–34.20) | 94    | 0 (reference)                                               |                   | 56                    | 0 (reference)                                               |      |
|                                                   | Q2 (34.21–86.20) | 103   | 0.41 (−0.19; 1.01)                                          | 0.18              | 66                    | 0.30 (−0.44; 1.03)                                          | 0.43 |
|                                                   | Q3 (86.21–159.8) | 106   | 0.38 (−0.21; 0.98)                                          | 0.21              | 61                    | 0.26 (−0.54; 1.06)                                          | 0.53 |
|                                                   | Q4 (> 159.8)     | 105   | −0.24 (−0.84; 0.36)                                         | 0.44              | 47                    | −0.40 (−1.32; 0.51)                                         | 0.39 |
|                                                   | p for trend      |       | 0.41                                                        |                   |                       | 0.36                                                        |      |
| Ponderal Index (g/cm <sup>3</sup> )               | Continuous       | 408   | −8.1e <sup>−5</sup> (−3e <sup>−4</sup> ; 2e <sup>−4</sup> ) | 0.41              | 230                   | −1.9e <sup>−5</sup> (−3e <sup>−4</sup> ; 2e <sup>−4</sup> ) | 0.88 |
|                                                   | Q1 (0.224–34.20) | 94    | 0 (reference)                                               |                   | 56                    | 0 (reference)                                               |      |
|                                                   | Q2 (34.21–86.20) | 103   | −0.02 (−0.08; 0.05)                                         | 0.60              | 66                    | 0.01 (−0.07; 0.10)                                          | 0.75 |
|                                                   | Q3 (86.21–159.8) | 106   | −0.006 (−0.08; 0.06)                                        | 0.86              | 61                    | 0.06 (−0.04; 0.15)                                          | 0.24 |
|                                                   | Q4 (> 159.8)     | 105   | 7.8e <sup>−5</sup> (−0.07; 0.07)                            | 0.99              | 47                    | 0.01 (−0.09; 0.05)                                          | 0.83 |
|                                                   | p for trend      |       | 0.90                                                        |                   |                       | 0.45                                                        |      |
| Head circumference (cm)                           | Continuous       | 407   | −0.001 (−0.002; 2e <sup>−4</sup> )                          | 0.13              | 230                   | −0.001 (−0.002; 0.001)                                      | 0.42 |
|                                                   | Q1 (0.224–34.20) | 94    | 0 (reference)                                               |                   | 56                    | 0 (reference)                                               |      |
|                                                   | Q2 (34.21–86.20) | 102   | 0.26 (−0.15; 0.68)                                          | 0.21              | 66                    | 0.42 (−0.11; 0.95)                                          | 0.12 |
|                                                   | Q3 (86.21–159.8) | 106   | 0.29 (−0.07; 0.65)                                          | 0.11              | 61                    | 0.30 (−0.18; 0.79)                                          | 0.22 |
|                                                   | Q4 (> 159.8)     | 105   | −0.06 (−0.44; 0.32)                                         | 0.74              | 47                    | −0.04 (−0.59; 0.51)                                         | 0.88 |
|                                                   | p for trend      |       | 0.74                                                        |                   |                       | 0.68                                                        |      |
| Gestational age at birth (week)                   | Continuous       | 408   | −0.001 (−0.002; 3e <sup>−4</sup> )                          | 0.16              | 230                   | −0.001 (−0.002; 4e <sup>−4</sup> )                          | 0.15 |
|                                                   | Q1 (0.224–34.20) | 94    | 0 (reference)                                               |                   | 56                    | 0 (reference)                                               |      |
|                                                   | Q2 (34.21–86.20) | 103   | −0.13 (−0.48; 0.22)                                         | 0.48              | 66                    | 0.01 (−0.44; 0.46)                                          | 0.97 |
|                                                   | Q3 (86.21–159.8) | 106   | 0.16 (−0.19; 0.50)                                          | 0.37              | 61                    | 0.10 (−0.36; 0.57)                                          | 0.66 |
|                                                   | Q4 (> 159.8)     | 105   | −0.25 (−0.60; 0.10)                                         | 0.16              | 47                    | −0.34 (−0.81; 0.13)                                         | 0.16 |
|                                                   | p for trend      |       | 0.43                                                        |                   |                       | 0.23                                                        |      |
| <b>Gestational age &lt; 37 weeks</b>              |                  |       |                                                             |                   |                       |                                                             |      |
| Birth weight (g)                                  | Continuous       | 24    | −0.46 (−3.27; 2.36)                                         | 0.74              | 16                    | −2.55 (−6.75; 1.66)                                         | 0.20 |
| Birth length (cm)                                 | Continuous       | 24    | −0.002 (−0.03; 0.02)                                        | 0.88              | 16                    | −0.03 (−0.07; 0.01)                                         | 0.12 |
| Ponderal Index (g/m <sup>3</sup> )                | Continuous       | 24    | 4.2e <sup>−5</sup> (−0.003; 0.003)                          | 0.97              | 16                    | 0.003 (−0.001; 0.008)                                       | 0.15 |
| Head circumference (cm)                           | Continuous       | 24    | 0.001 (−0.01; 0.01)                                         | 0.88              | 16                    | −0.007 (−0.02; 0.01)                                        | 0.38 |
| Gestational week at birth                         | Continuous       | 24    | 0.002 (−0.01; 0.02)                                         | 0.76              | 16                    | −0.009 (−0.03; 0.01)                                        | 0.32 |

$\beta$  (95% CI): regression coefficient (95% confidential interval). <sup>a</sup>adjusted for maternal age (year), pre-pregnancy BMI (kg/m<sup>2</sup>), plasma cotinine, alcohol intake during pregnancy, education level and parity. Bold value indicates statistical significance ( $p \leq 0.050$ ), # borderline significance ( $p \leq 0.080$ ).
